# Supplementary material for: Formation of a planar biomimetic membrane with a novel zwitterionic polymer for nanopore sequencing
Source: Royal Society of Chemistry journal article supplement (doi:10.1039/d4tb01007h), 2024-01-01
Supplement: d4tb01007h1.pdf [file d4tb01007h1.pdf]

Supporting Information:

## Formation of planar biomimetic membrane with a novel zwitterionic polymer for nanopore sequencing

Xiaowei YANG, Jinfeng YANG, Lai WEI, Yuning ZHANG, Jingnan YANG\*, Ming NI\*, Yuliang  
DONG\*

BGI research, Shenzhen 518083, China

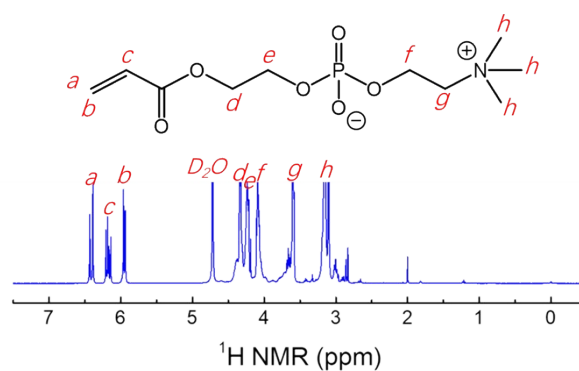

Figure S1. <sup>1</sup>H NMR spectrum of 2-acryloyloxyethyl phosphorylcholine (APC) in D<sub>2</sub>O.

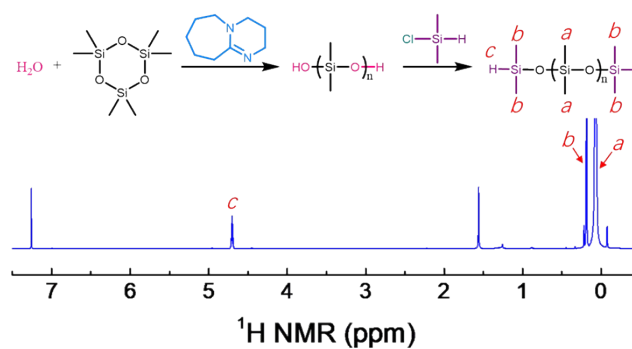

Figure S2. Synthetic route of PDMS end-capped with Si-H bonds and its representative <sup>1</sup>H NMR spectrum in CDCl<sub>3</sub>.

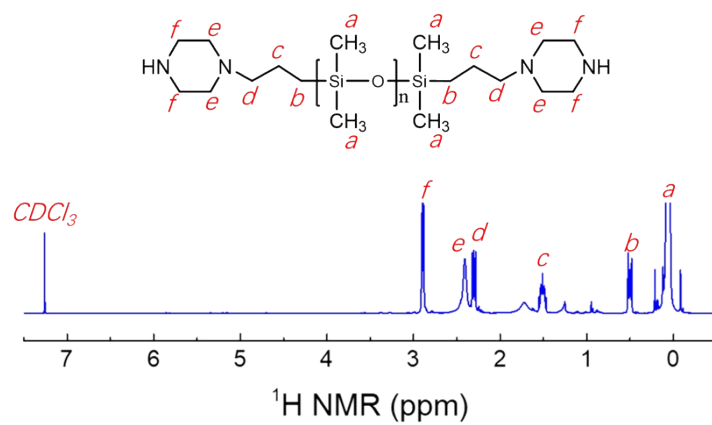

Figure S3. <sup>1</sup>H NMR spectrum of piperazine-terminated PDMS in CDCl<sub>3</sub>.
